# Supplementary material
Source: Springer Nature journal article supplement (https://www.springermedizin.de/resource/supplementary/12955_2013_1198_MOESM5_ESM.pdf/9559024)

# Correlations of change in CAT and CCQ scores)

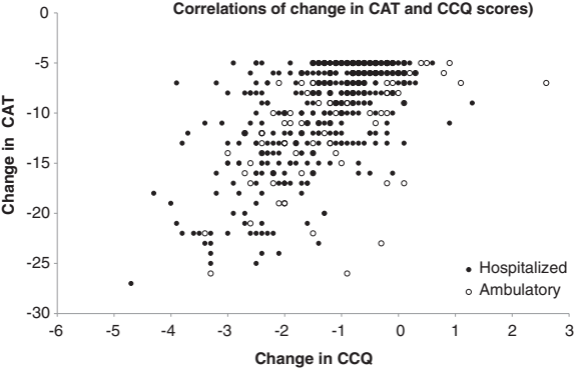

Supplement: MOESM5 [file 9559024]
